# Supplementary material
Source: Springer Nature journal article supplement (https://www.springerprofessional.de/resource/supplementary/13638_2011_21_MOESM9_ESM.pdf/11897282)
Supplement: MOESM9 [file 11897282]

---

*Algorithm 2: Whenever the sender detects non-congestion event*

---

1. *If (non-congestion event)*
  2. *{*
  3. *send new packet*
  4. *compute 'delay-thresh'*
  5. *cwnd increment to one mss*
  6. *ssthresh = now*
  7. *Retransmission Delay()*
  8. *}*
-
